# Supplementary material for: Electronic structure and catalytic aspects of [Ru(tpm)(bqdi)(Cl/H2O)]n, tpm = tris(1-pyrazolyl)methane and bqdi = o-benzoquinonediimine
Source: Royal Society of Chemistry journal article supplement (doi:10.1039/c2dt32402d), 2012-12-11

**Electronic structure and catalytic aspects of [Ru(tpm)(bqdi)(Cl/H<sub>2</sub>O)]<sup>n</sup>,  
tpm = tris(1-pyrazolyl)methane and bqdi = *o*-benzoquinonediimine**

Hemlata Agarwala,<sup>a</sup> Fabian Ehret,<sup>b</sup> Abhishek Dutta Chowdhury,<sup>a</sup> Somnath Maji,<sup>a</sup> Shaikh  
M. Mobin,<sup>a</sup> Wolfgang Kaim,<sup>\*b</sup> and Goutam Kumar Lahiri<sup>\*a</sup>

<sup>a</sup>*Department of Chemistry, Indian Institute of Technology Bombay, Powai, Mumbai-  
400076, India. E-mail: [lahiri@chem.iitb.ac.in](mailto:lahiri@chem.iitb.ac.in)*

<sup>b</sup>*Institut für Anorganische Chemie, Universität Stuttgart, Pfaffenwaldring 55, D-70550  
Stuttgart, Germany. E-mail: [kaim@iac.uni-stuttgart.de](mailto:kaim@iac.uni-stuttgart.de)*

**Table S1** Experimental (X-ray) and DFT calculated selected bond angles (°) of **1<sup>+</sup>** and **2<sup>2+</sup>** (**Molecule A**)

| Bond angles       | <b>1<sup>+</sup></b> |         | <b>2<sup>2+</sup></b> |         |
|-------------------|----------------------|---------|-----------------------|---------|
|                   | X-ray                | DFT     | X-ray                 | DFT     |
| N(1)–Ru(1)–N(2)   | 77.86(13)            | 77.115  | 77.90(19)             | 76.380  |
| N(1)–Ru(1)–N(3)   | 175.06(13)           | 176.707 | 173.31(19)            | 175.501 |
| N(1)–Ru(1)–N(5)   | 95.01(13)            | 97.209  | 93.71(18)             | 94.746  |
| N(1)–Ru(1)–N(7)   | 98.11(13)            | 99.850  | 98.61(18)             | 99.817  |
| N(2)–Ru(1)–N(3)   | 97.92(13)            | 99.793  | 95.76(17)             | 99.129  |
| N(2)–Ru(1)–N(5)   | 92.12(13)            | 97.154  | 94.76(17)             | 94.967  |
| N(2)–Ru(1)–N(7)   | 175.32(13)           | 176.782 | 176.30(17)            | 176.142 |
| N(3)–Ru(1)–N(5)   | 82.50(13)            | 84.242  | 84.61(17)             | 85.303  |
| N(3)–Ru(1)–N(7)   | 85.99(13)            | 83.219  | 87.68(17)             | 84.670  |
| N(5)–Ru(1)–N(7)   | 85.82(13)            | 84.234  | 84.17(16)             | 84.639  |
| N(9)–Ru(2)–N(10)  | -                    | -       | 77.57(19)             | -       |
| N(9)–Ru(2)–N(11)  | -                    | -       | 175.70(17)            | -       |
| N(9)–Ru(2)–N(13)  | -                    | -       | 96.79(17)             | -       |
| N(9)–Ru(2)–N(15)  | -                    | -       | 97.11(17)             | -       |
| N(10)–Ru(2)–N(11) | -                    | -       | 98.68(19)             | -       |
| N(10)–Ru(2)–N(13) | -                    | -       | 94.28(17)             | -       |
| N(10)–Ru(2)–N(15) | -                    | -       | 174.30(2)             | -       |
| N(11)–Ru(2)–N(13) | -                    | -       | 85.53(17)             | -       |
| N(11)–Ru(2)–N(15) | -                    | -       | 86.71(16)             | -       |
| N(13)–Ru(2)–N(15) | -                    | -       | 84.19(16)             | -       |
| N(1)–Ru(1)–Cl(1)  | 91.04(10)            | 89.984  | -                     | -       |
| N(2)–Ru(1)–Cl(1)  | 91.79(10)            | 89.994  | -                     | -       |
| N(3)–Ru(1)–Cl(1)  | 91.66(10)            | 88.877  | -                     | -       |
| N(5)–Ru(1)–Cl(1)  | 173.37(9)            | 170.815 | -                     | -       |

|                  |           |        |            |         |
|------------------|-----------|--------|------------|---------|
| N(7)–Ru(1)–Cl(1) | 90.66(10) | 88.926 | -          | -       |
| N(1)–Ru(1)–O(1)  | -         | -      | 89.78(17)  | 92.384  |
| N(2)–Ru(1)–O(1)  | -         | -      | 88.70(16)  | 88.738  |
| N(3)–Ru(1)–O(1)  | -         | -      | 92.24(15)  | 87.754  |
| N(5)–Ru(1)–O(1)  | -         | -      | 175.53(15) | 172.569 |
| N(7)–Ru(1)–O(1)  | -         | -      | 92.55(15)  | 92.092  |
| N(9)–Ru(2)–O(2)  | -         | -      | 86.36(16)  | -       |
| N(10)–Ru(2)–O(2) | -         | -      | 88.96(16)  | -       |
| N(11)–Ru(2)–O(2) | -         | -      | 91.49(16)  | -       |
| N(13)–Ru(2)–O(2) | -         | -      | 175.90(15) | -       |
| N(15)–Ru(2)–O(2) | -         | -      | 92.83(15)  | -       |

---

**Table S2** Composition and energies of selected molecular orbitals of  $\mathbf{1}^+$  ( $S=0$ )

| MO      | Energy (eV) | Ru   | tpm  | bqdi | Cl   |
|---------|-------------|------|------|------|------|
| HOMO-10 | -10.886     | 0.05 | 0.91 | 0.04 | 0.01 |
| HOMO-9  | -10.791     | 0.05 | 0.92 | 0.01 | 0.03 |
| HOMO-8  | -10.729     | 0.01 | 0.97 | 0.00 | 0.02 |
| HOMO-7  | -10.365     | 0.21 | 0.21 | 0.02 | 0.56 |
| HOMO-6  | -10.199     | 0.00 | 1.00 | 0.00 | 0.00 |
| HOMO-5  | -9.885      | 0.21 | 0.19 | 0.34 | 0.26 |
| HOMO-4  | -9.693      | 0.39 | 0.08 | 0.15 | 0.38 |
| HOMO-3  | -9.105      | 0.02 | 0.03 | 0.49 | 0.46 |
| HOMO-2  | -8.952      | 0.71 | 0.16 | 0.05 | 0.07 |
| HOMO-1  | -8.521      | 0.34 | 0.05 | 0.14 | 0.47 |
| HOMO    | -8.081      | 0.58 | 0.08 | 0.10 | 0.24 |
| LUMO    | -5.919      | 0.23 | 0.07 | 0.68 | 0.03 |
| LUMO+1  | -3.868      | 0.04 | 0.95 | 0.01 | 0.00 |
| LUMO+2  | -3.837      | 0.04 | 0.95 | 0.01 | 0.00 |
| LUMO+3  | -3.306      | 0.47 | 0.28 | 0.08 | 0.17 |
| LUMO+4  | -3.113      | 0.02 | 0.96 | 0.02 | 0.00 |
| LUMO+5  | -2.706      | 0.09 | 0.04 | 0.87 | 0.01 |
| LUMO+6  | -2.657      | 0.37 | 0.24 | 0.39 | 0.00 |
| LUMO+7  | -2.368      | 0.21 | 0.12 | 0.67 | 0.00 |
| LUMO+8  | -2.148      | 0.08 | 0.91 | 0.01 | 0.00 |
| LUMO+9  | -2.125      | 0.52 | 0.27 | 0.21 | 0.01 |
| LUMO+10 | -1.814      | 0.43 | 0.48 | 0.08 | 0.01 |

Contour plots of selected MOs of  $\mathbf{1}^+$

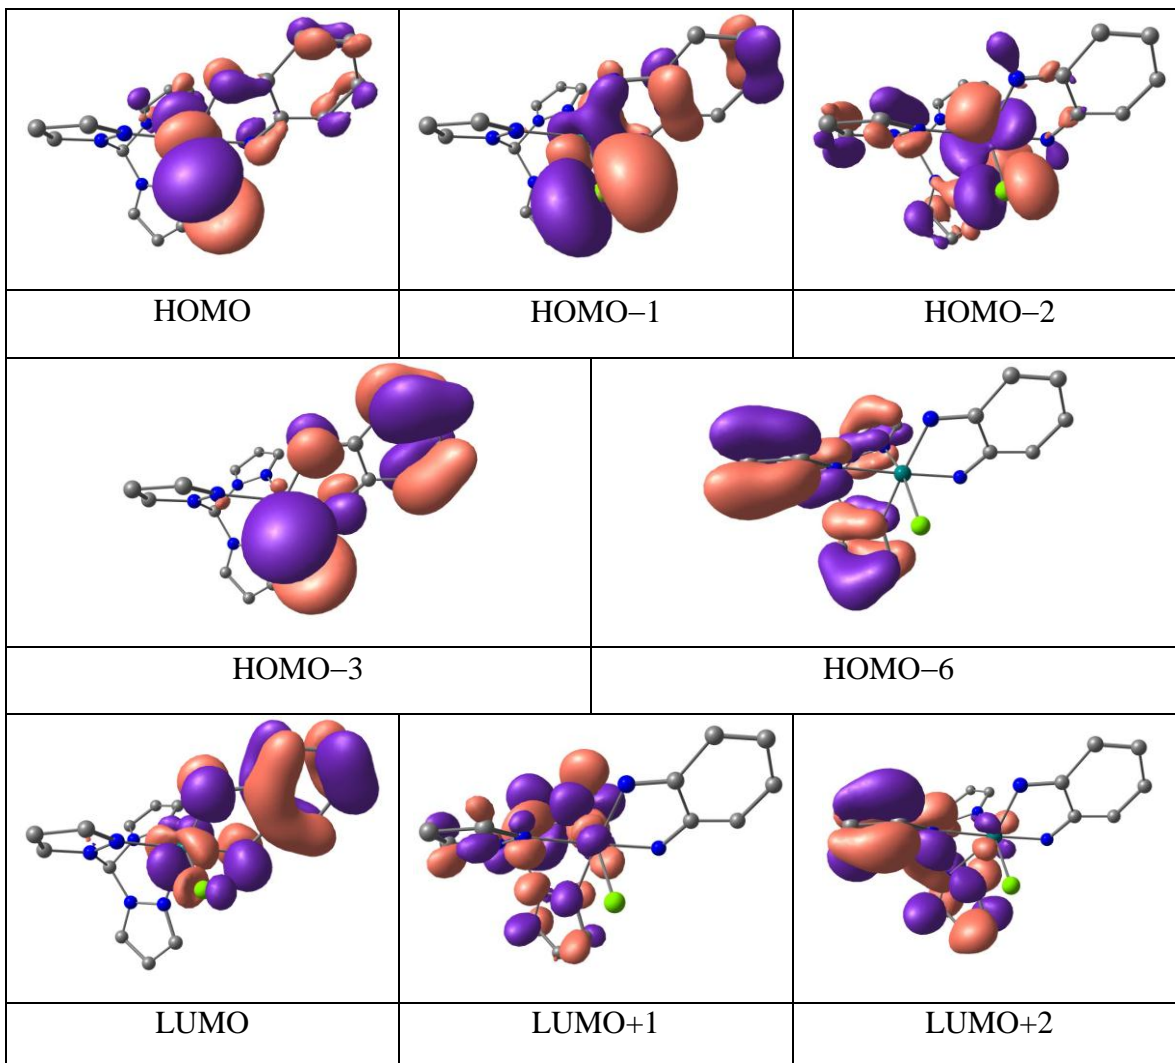

**Table S3** Composition and energies of selected molecular orbitals of  $\mathbf{1}^{2+}$  ( $S=1/2$ )

| MO             | Energy (eV) | Ru   | tpm  | bqdi | Cl   |
|----------------|-------------|------|------|------|------|
| $\alpha$ -spin |             |      |      |      |      |
| HOMO-10        | -14.6975    | 0.33 | 0.37 | 0.05 | 0.24 |
| HOMO-9         | -14.5133    | 0.07 | 0.81 | 0.04 | 0.08 |
| HOMO-8         | -14.3391    | 0.44 | 0.10 | 0.23 | 0.23 |
| HOMO-7         | -14.1125    | 0.01 | 0.88 | 0.01 | 0.11 |
| HOMO-6         | -14.0853    | 0.17 | 0.80 | 0.02 | 0.01 |
| HOMO-5         | -13.8708    | 0.02 | 0.81 | 0.04 | 0.13 |
| HOMO-4         | -13.3821    | 0.05 | 0.79 | 0.02 | 0.15 |
| HOMO-3         | -13.3465    | 0.35 | 0.48 | 0.03 | 0.15 |
| HOMO-2         | -13.2836    | 0.17 | 0.25 | 0.17 | 0.41 |
| HOMO-1         | -12.9979    | 0.35 | 0.08 | 0.06 | 0.51 |
| SOMO           | -12.8858    | 0.25 | 0.06 | 0.64 | 0.06 |
| LUMO           | -9.9513     | 0.12 | 0.05 | 0.82 | 0.01 |
| LUMO+1         | -7.8701     | 0.47 | 0.26 | 0.09 | 0.18 |
| LUMO+2         | -7.3841     | 0.38 | 0.33 | 0.29 | 0.00 |
| LUMO+3         | -7.3063     | 0.15 | 0.78 | 0.06 | 0.00 |
| LUMO+4         | -7.1329     | 0.03 | 0.95 | 0.01 | 0.01 |
| LUMO+5         | -6.3857     | 0.01 | 0.97 | 0.02 | 0.00 |
| LUMO+6         | -6.3618     | 0.04 | 0.03 | 0.93 | 0.00 |
| LUMO+7         | -6.1713     | 0.02 | 0.03 | 0.95 | 0.00 |
| LUMO+8         | -5.2937     | 0.40 | 0.35 | 0.24 | 0.00 |
| LUMO+9         | -5.1171     | 0.05 | 0.94 | 0.01 | 0.00 |
| LUMO+10        | -4.9653     | 0.22 | 0.61 | 0.16 | 0.00 |

---

| $\beta$ -spin |          |      |      |      |      |
|---------------|----------|------|------|------|------|
| HOMO-10       | -14.8028 | 0.07 | 0.76 | 0.12 | 0.05 |
| HOMO-9        | -14.5829 | 0.19 | 0.46 | 0.06 | 0.29 |
| HOMO-8        | -14.2159 | 0.09 | 0.7  | 0.05 | 0.16 |
| HOMO-7        | -14.1533 | 0.45 | 0.09 | 0.19 | 0.27 |
| HOMO-6        | -14.0289 | 0.00 | 0.96 | 0.00 | 0.03 |
| HOMO-5        | -14.0248 | 0.18 | 0.79 | 0.02 | 0.00 |
| HOMO-4        | -13.6657 | 0.06 | 0.44 | 0.12 | 0.37 |
| HOMO-3        | -13.3519 | 0.00 | 0.99 | 0.00 | 0.01 |
| HOMO-2        | -13.1935 | 0.45 | 0.37 | 0.03 | 0.15 |
| HOMO-1        | -12.9514 | 0.00 | 0.02 | 0.74 | 0.24 |
| HOMO          | -12.7761 | 0.40 | 0.08 | 0.09 | 0.43 |
| LUMO          | -10.4672 | 0.65 | 0.10 | 0.07 | 0.18 |
| LUMO+1        | -9.8914  | 0.15 | 0.05 | 0.78 | 0.02 |
| LUMO+2        | -7.6124  | 0.47 | 0.27 | 0.09 | 0.17 |
| LUMO+3        | -7.2122  | 0.07 | 0.87 | 0.05 | 0.00 |
| LUMO+4        | -7.1117  | 0.04 | 0.93 | 0.01 | 0.01 |
| LUMO+5        | -7.0391  | 0.43 | 0.28 | 0.30 | 0.00 |
| LUMO+6        | -6.3719  | 0.01 | 0.96 | 0.03 | 0.00 |
| LUMO+7        | -6.3495  | 0.04 | 0.03 | 0.93 | 0.00 |
| LUMO+8        | -6.1384  | 0.03 | 0.04 | 0.93 | 0.00 |
| LUMO+9        | -5.2758  | 0.42 | 0.31 | 0.26 | 0.00 |
| LUMO+10       | -5.1150  | 0.05 | 0.94 | 0.01 | 0.00 |

---

Contour plots of selected MOs of  $\mathbf{1}^{2+}$

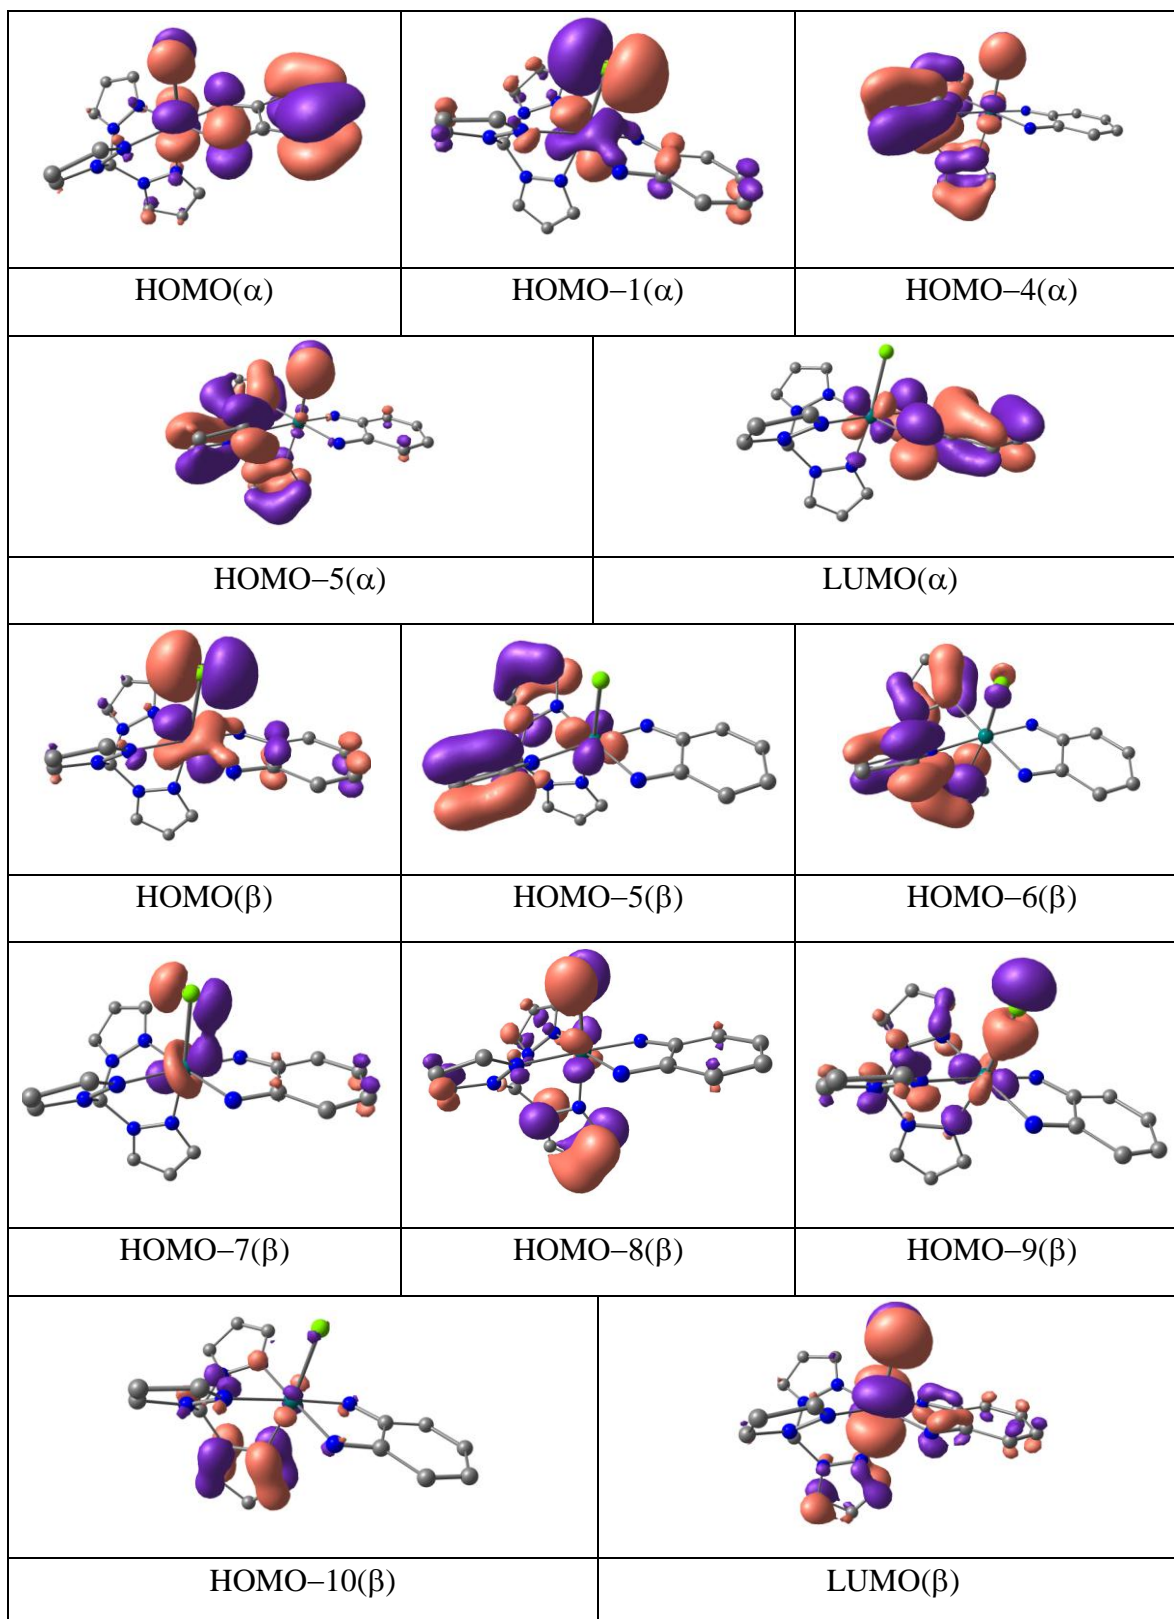



**Table S4** Composition and energies of selected molecular orbitals of **1** ( $S=1/2$ )

| MO             | Energy (eV) | Ru   | tpm  | bqdi | Cl   |
|----------------|-------------|------|------|------|------|
| $\alpha$ -spin |             |      |      |      |      |
| HOMO-10        | -7.7071     | 0.00 | 0.88 | 0.11 | 0.00 |
| HOMO-9         | -7.6410     | 0.00 | 0.55 | 0.44 | 0.00 |
| HOMO-8         | -7.2949     | 0.00 | 1.00 | 0.00 | 0.00 |
| HOMO-7         | -6.5863     | 0.18 | 0.14 | 0.00 | 0.67 |
| HOMO-6         | -6.0203     | 0.22 | 0.09 | 0.21 | 0.48 |
| HOMO-5         | -5.9702     | 0.35 | 0.08 | 0.15 | 0.43 |
| HOMO-4         | -5.2271     | 0.00 | 0.00 | 0.60 | 0.37 |
| HOMO-3         | -5.0360     | 0.68 | 0.15 | 0.00 | 0.13 |
| HOMO-2         | -4.8159     | 0.45 | 0.08 | 0.11 | 0.36 |
| HOMO-1         | -4.2194     | 0.59 | 0.11 | 0.15 | 0.16 |
| SOMO           | -3.2790     | 0.19 | 0.08 | 0.70 | 0.00 |
| LUMO           | -0.8566     | 0.05 | 0.94 | 0.00 | 0.00 |
| LUMO+1         | -0.7725     | 0.06 | 0.93 | 0.00 | 0.00 |
| LUMO+2         | -0.1453     | 0.00 | 1.00 | 0.00 | 0.00 |
| LUMO+3         | 0.5513      | 0.07 | 0.93 | 0.00 | 0.00 |
| LUMO+4         | 0.6699      | 0.43 | 0.36 | 0.08 | 0.13 |
| LUMO+5         | 0.8003      | 0.62 | 0.31 | 0.06 | 0.00 |
| LUMO+6         | 1.0795      | 0.33 | 0.54 | 0.12 | 0.00 |
| LUMO+7         | 1.1285      | 0.15 | 0.46 | 0.38 | 0.00 |
| LUMO+8         | 1.2558      | 0.24 | 0.55 | 0.21 | 0.00 |
| LUMO+9         | 1.2896      | 0.32 | 0.55 | 0.12 | 0.00 |
| LUMO+10        | 1.4493      | 0.12 | 0.86 | 0.00 | 0.00 |

---

| $\beta$ -spin |         |      |      |      |      |
|---------------|---------|------|------|------|------|
| HOMO-10       | -7.6927 | 0.98 | 0.00 | 0.00 | 0.00 |
| HOMO-9        | -7.3820 | 0.12 | 0.00 | 0.77 | 0.07 |
| HOMO-8        | -7.2946 | 0.00 | 0.99 | 0.00 | 0.00 |
| HOMO-7        | -7.1896 | 0.00 | 0.19 | 0.74 | 0.00 |
| HOMO-6        | -6.5468 | 0.17 | 0.14 | 0.00 | 0.68 |
| HOMO-5        | -5.9520 | 0.20 | 0.09 | 0.17 | 0.54 |
| HOMO-4        | -5.7634 | 0.21 | 0.06 | 0.14 | 0.59 |
| HOMO-3        | -4.9623 | 0.76 | 0.15 | 0.00 | 0.00 |
| HOMO-2        | -4.8839 | 0.14 | 0.00 | 0.45 | 0.36 |
| HOMO-1        | -4.5275 | 0.51 | 0.09 | 0.11 | 0.29 |
| HOMO          | -3.9936 | 0.49 | 0.10 | 0.33 | 0.08 |
| LUMO          | -1.5230 | 0.14 | 0.19 | 0.65 | 0.00 |
| LUMO+1        | -0.7997 | 0.07 | 0.88 | 0.00 | 0.00 |
| LUMO+2        | -0.7674 | 0.06 | 0.93 | 0.00 | 0.00 |
| LUMO+3        | -0.1396 | 0.00 | 1.00 | 0.00 | 0.00 |
| LUMO+4        | 0.5554  | 0.07 | 0.93 | 0.00 | 0.00 |
| LUMO+5        | 0.7320  | 0.43 | 0.37 | 0.08 | 0.12 |
| LUMO+6        | 0.8117  | 0.62 | 0.32 | 0.06 | 0.00 |
| LUMO+7        | 1.0993  | 0.23 | 0.74 | 0.00 | 0.00 |
| LUMO+8        | 1.2727  | 0.27 | 0.67 | 0.06 | 0.00 |
| LUMO+9        | 1.3293  | 0.49 | 0.28 | 0.21 | 0.00 |
| LUMO+10       | 1.3696  | 0.29 | 0.47 | 0.24 | 0.00 |

---

Contour plots of selected MOs of **1**

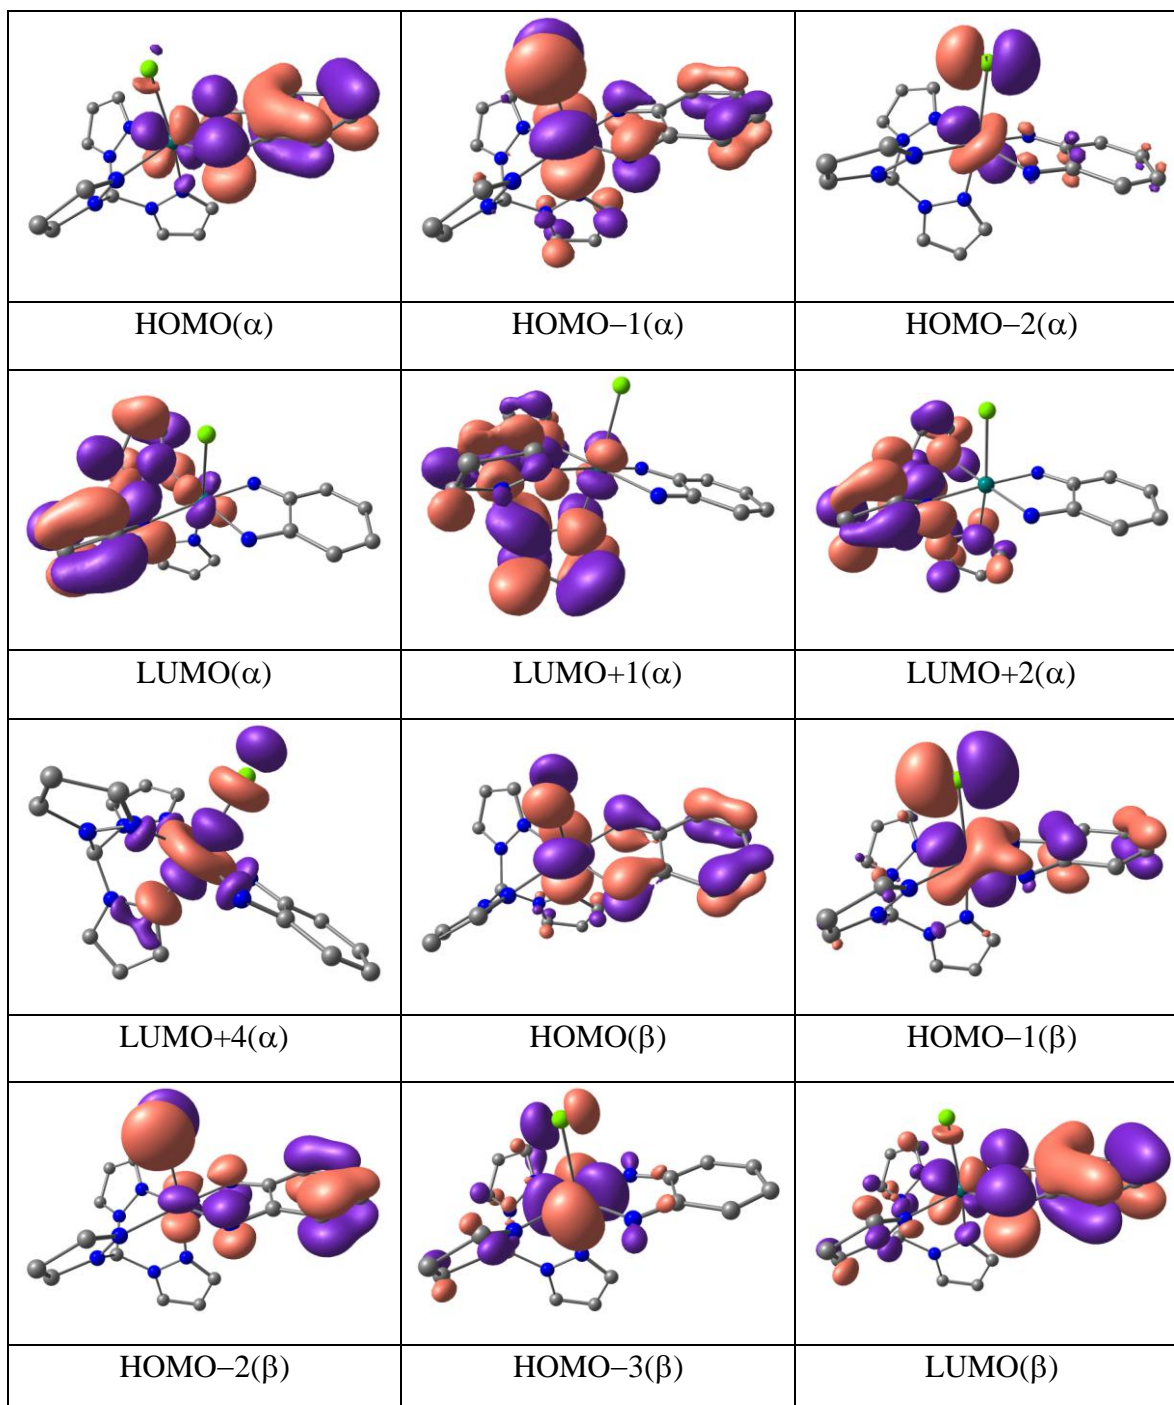

**Table S5** DFT calculated selected bond distances (Å) of  $\mathbf{1}^n$  ( $n = 2+, 1+, 0$ )

| Bond distances | DFT            |                   |              |
|----------------|----------------|-------------------|--------------|
|                | $\mathbf{1}^+$ | $\mathbf{1}^{2+}$ | $\mathbf{1}$ |
| Ru(1)–N(1)     | 2.020          | 2.034             | 2.0527       |
| Ru(1)–N(2)     | 2.020          | 2.033             | 2.0525       |
| Ru(1)–N(3)     | 2.139          | 2.134             | 2.132        |
| Ru(1)–N(5)     | 2.127          | 2.116             | 2.086        |
| Ru(1)–N(7)     | 2.139          | 2.134             | 2.129        |
| Ru(1)–Cl(1)    | 2.405          | 2.328             | 2.452        |
| C(1)–N(1)      | 1.318          | 1.312             | 1.342        |
| C(6)–N(2)      | 1.318          | 1.312             | 1.343        |
| C(1)–C(2)      | 1.434          | 1.435             | 1.419        |
| C(2)–C(3)      | 1.364          | 1.363             | 1.383        |
| C(3)–C(4)      | 1.442          | 1.451             | 1.416        |
| C(4)–C(5)      | 1.364          | 1.363             | 1.383        |
| C(5)–C(6)      | 1.434          | 1.435             | 1.419        |
| C(6)–C(1)      | 1.468          | 1.484             | 1.453        |

**Table S6** TD-DFT calculated electronic transitions of **2<sup>2+</sup>** (**Molecule A**)

| Energy<br>(eV) | $\lambda$ (nm) | $f^a$  | $\lambda_{\text{expt.}}$ (nm)<br>( $\epsilon$ (dm <sup>3</sup> mol <sup>-1</sup> cm <sup>-1</sup> )) | Transition            | Character                   |
|----------------|----------------|--------|------------------------------------------------------------------------------------------------------|-----------------------|-----------------------------|
| 1.86           | 667.71         | 0.0212 | 720(1210)                                                                                            | HOMO-2→LUMO<br>(0.60) | Ru(d $\pi$ )→Q( $\pi^*$ )   |
| 2.87           | 432.48         | 0.3620 | 497(19800)                                                                                           | HOMO-3→LUMO<br>(0.55) | Ru(d $\pi$ )→Q( $\pi^*$ )   |
| 4.13           | 300.43         | 0.0313 | 316(5500)                                                                                            | HOMO→LUMO+2<br>(0.50) | Ru(d $\pi$ )→tpm( $\pi^*$ ) |

<sup>a</sup>Oscillator strength

**Table S7** Composition and energies of selected molecular orbitals of  $2^{2+}$  ( $S=0$ ) (**Molecule A**)

| MO      | Energy (eV) | Ru   | tpm  | bqdi | H <sub>2</sub> O |
|---------|-------------|------|------|------|------------------|
| HOMO-10 | -14.947     | 0.13 | 0.05 | 0.81 | 0.00             |
| HOMO-9  | -14.404     | 0.07 | 0.85 | 0.06 | 0.02             |
| HOMO-8  | -14.347     | 0.08 | 0.81 | 0.10 | 0.01             |
| HOMO-7  | -13.769     | 0.08 | 0.90 | 0.02 | 0.00             |
| HOMO-6  | -13.713     | 0.01 | 0.99 | 0.01 | 0.00             |
| HOMO-5  | -13.708     | 0.08 | 0.90 | 0.02 | 0.00             |
| HOMO-4  | -13.103     | 0.00 | 1.00 | 0.00 | 0.00             |
| HOMO-3  | -12.765     | 0.79 | 0.08 | 0.12 | 0.01             |
| HOMO-2  | -12.749     | 0.17 | 0.14 | 0.67 | 0.01             |
| HOMO-1  | -12.211     | 0.70 | 0.19 | 0.11 | 0.00             |
| HOMO    | -11.741     | 0.63 | 0.12 | 0.23 | 0.02             |
| LUMO    | -9.359      | 0.18 | 0.05 | 0.76 | 0.02             |
| LUMO+1  | -7.036      | 0.42 | 0.34 | 0.06 | 0.17             |
| LUMO+2  | -6.846      | 0.07 | 0.91 | 0.01 | 0.01             |
| LUMO+3  | -6.758      | 0.14 | 0.82 | 0.01 | 0.03             |
| LUMO+4  | -6.124      | 0.41 | 0.27 | 0.32 | 0.00             |
| LUMO+5  | -6.105      | 0.05 | 0.92 | 0.03 | 0.00             |
| LUMO+6  | -5.930      | 0.23 | 0.08 | 0.63 | 0.06             |
| LUMO+7  | -5.675      | 0.38 | 0.13 | 0.22 | 0.28             |
| LUMO+8  | -5.649      | 0.02 | 0.02 | 0.95 | 0.00             |
| LUMO+9  | -5.058      | 0.52 | 0.24 | 0.21 | 0.03             |
| LUMO+10 | -5.011      | 0.59 | 0.32 | 0.07 | 0.02             |

Contour plots of selected MOs of  $2^{2+}$

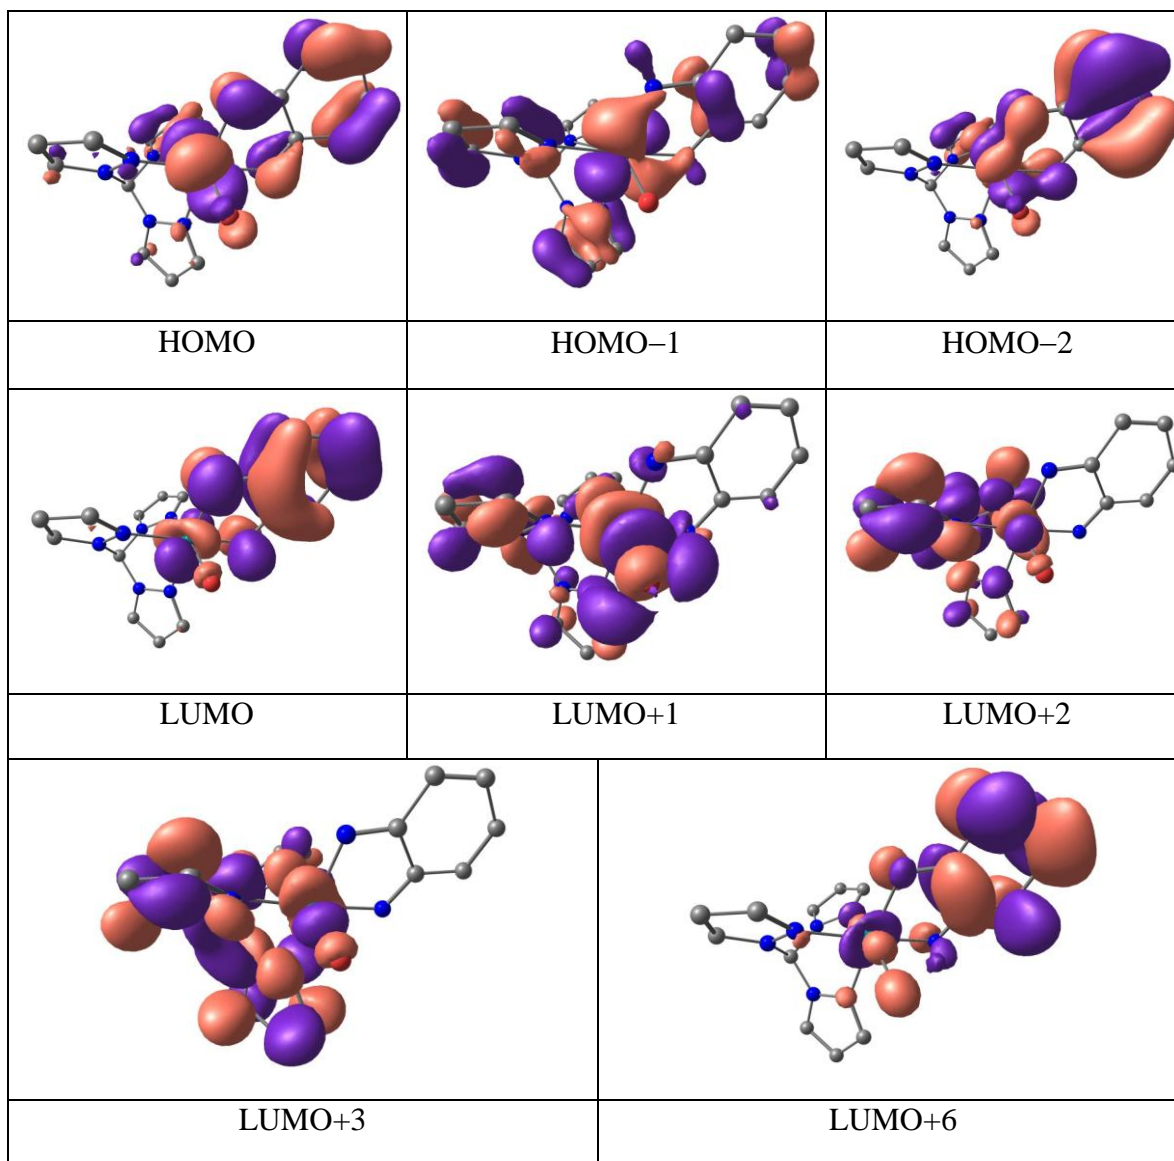

**Table S8** DFT calculated selected bond distances (Å) based on the optimised structures  
 of  $3^{2+}$  and ( $3^{2+}$  + styrene) adduct (A)

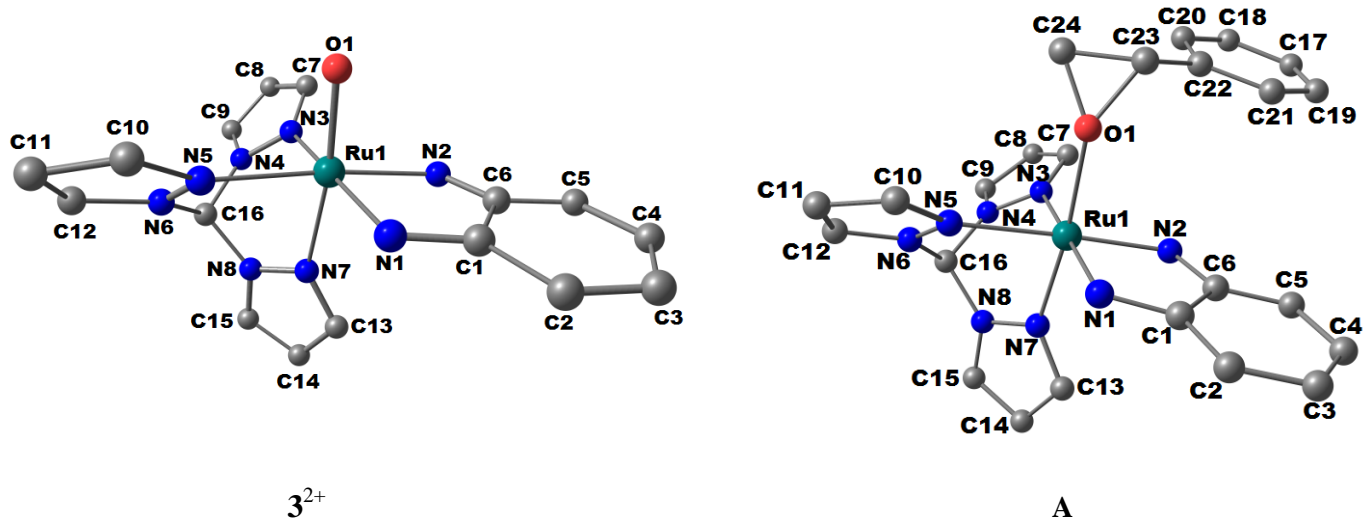

| Bond distances | $3^{2+}$ (Å) | A (Å) |
|----------------|--------------|-------|
| Ru(1)–O(1)     | 1.782        | 2.172 |
| C(23)–C(24)    | -            | 1.472 |
| O(1)–C(23)     | -            | 1.509 |
| O(1)–C(24)     | -            | 1.447 |
| Ru(1)–N(1)     | 2.081        | 2.001 |
| Ru(1)–N(2)     | 2.081        | 2.007 |
| Ru(1)–N(3)     | 2.129        | 2.169 |
| Ru(1)–N(5)     | 2.129        | 2.158 |
| Ru(1)–N(7)     | 2.252        | 2.072 |



**Fig. S1** ESI(+) mass spectra of (a)  $[1]^+$  in  $\text{CH}_3\text{CN}$ , (b)  $\{[2](\text{ClO}_4)_2\text{-ClO}_4\text{-H}_2\text{O}\}^+$  in  $\text{H}_2\text{O}$ ,  
(c) *in situ* generated  $\{[3](\text{ClO}_4)_2\text{-ClO}_4\}^+$  and (d) *in situ* generated adduct of  $3^{2+}$   
+ styrene (A) ( $m/z$ ).

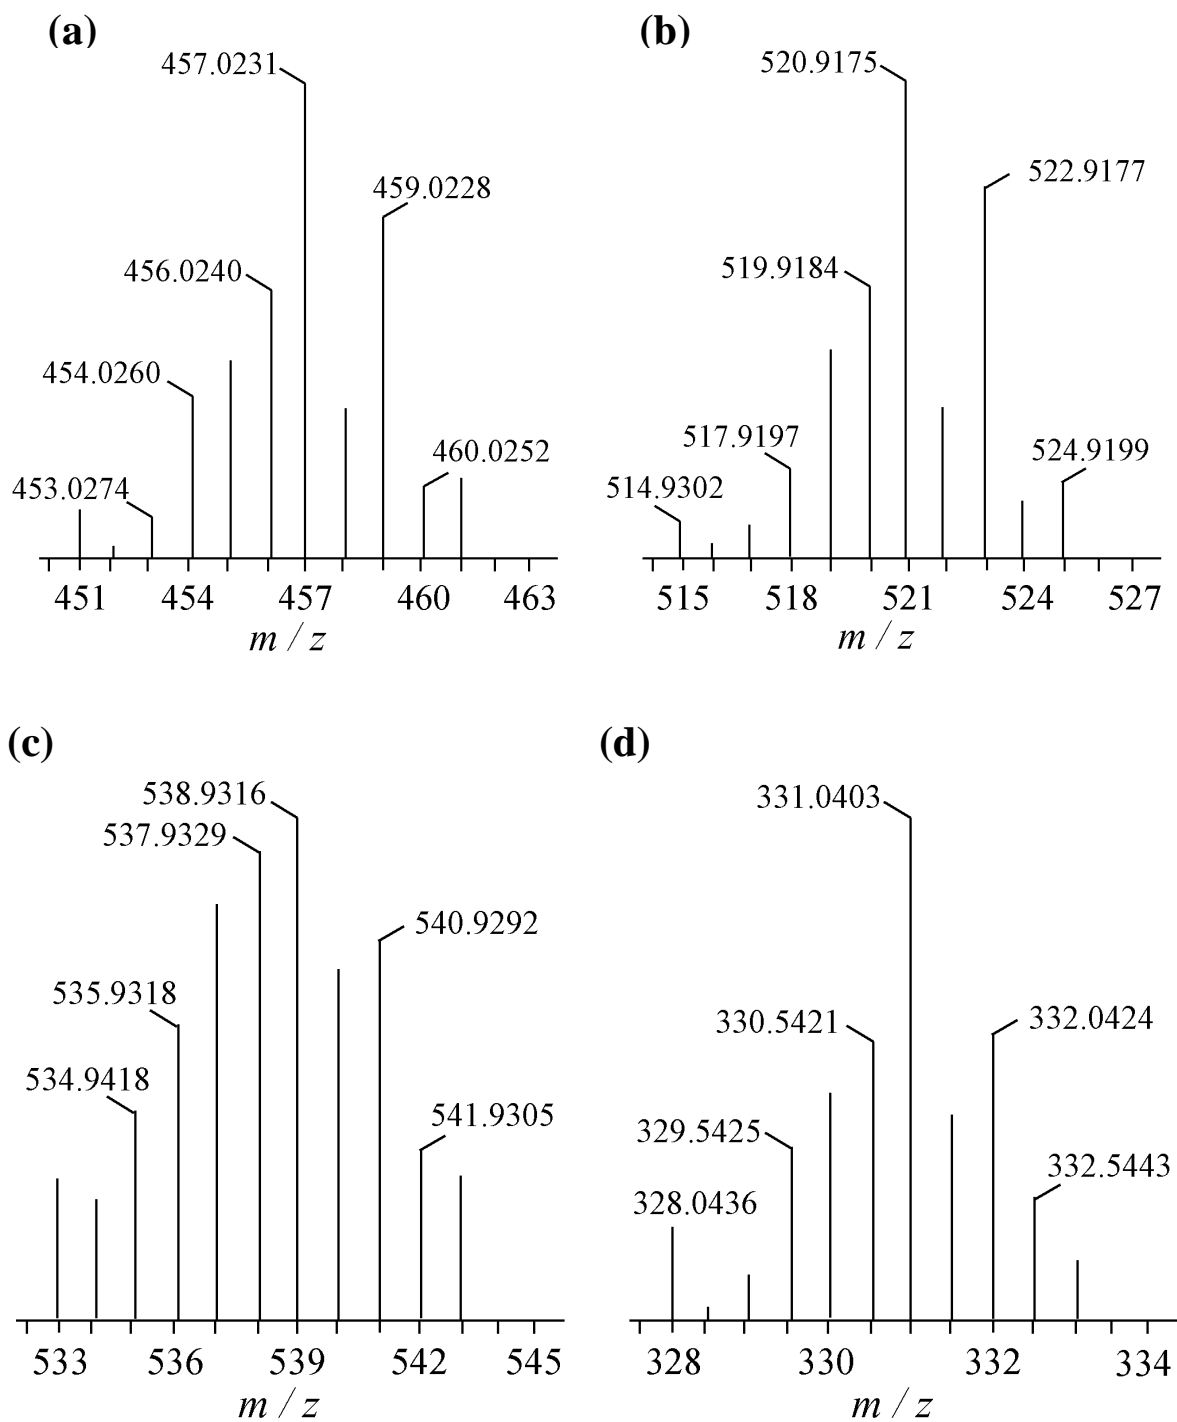

**Fig. S2** DFT optimised structures of (a)  $1^+$  and (b)  $2^{2+}$  (**Molecule A**, see Fig. 2 in the text).

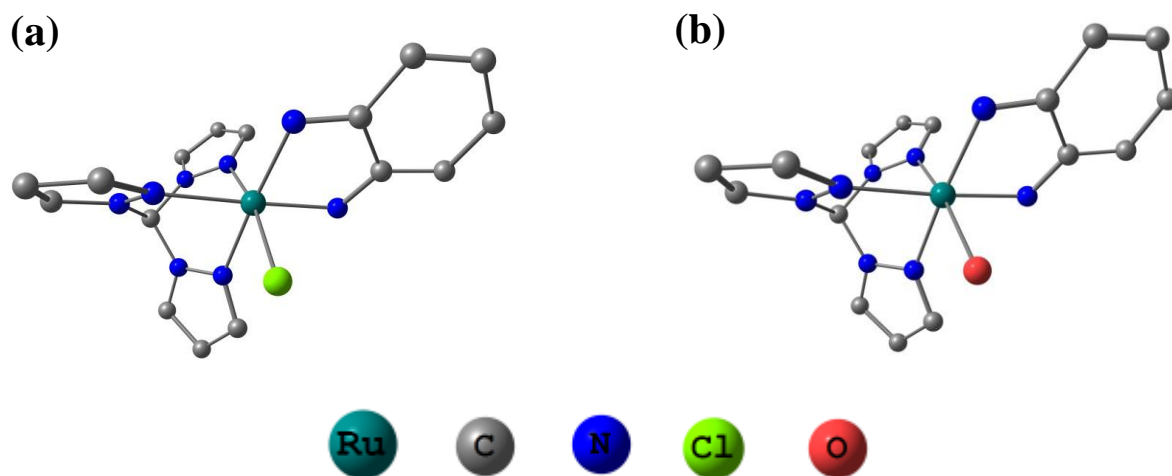

**Fig. S3(a)**  $^1\text{H}$  NMR spectra of **[1]** $\text{ClO}_4$  in (a)  $\text{CDCl}_3$ , (b)  $(\text{CD}_3)_2\text{SO}$ , (c)  $\text{CD}_3\text{CN}$ , (d)  $(\text{CD}_3)_2\text{CO}$ , and **[2]** $(\text{ClO}_4)_2$  in (e)  $(\text{CD}_3)_2\text{CO}$ , (f)  $\text{D}_2\text{O}$ .

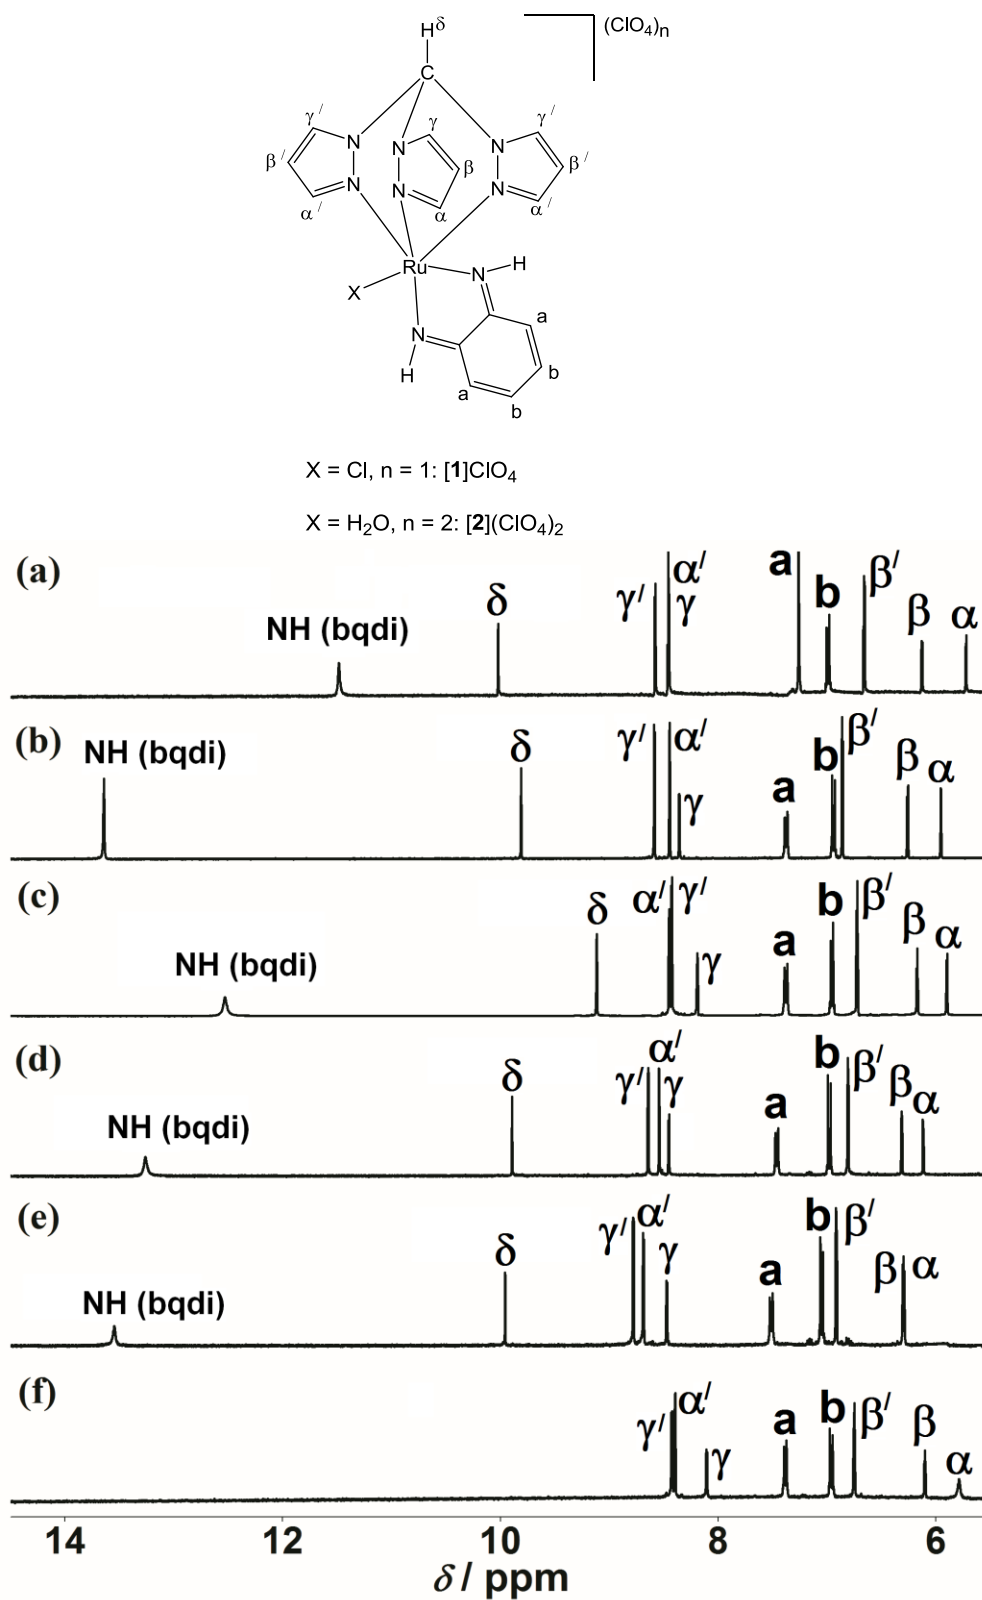

**Fig. S3(b)**  $^1\text{H}$ - $^1\text{H}$  COSY NMR of **[1]** $\text{ClO}_4$  in  $\text{CD}_3\text{CN}$ : (i) full range, (ii) expanded.

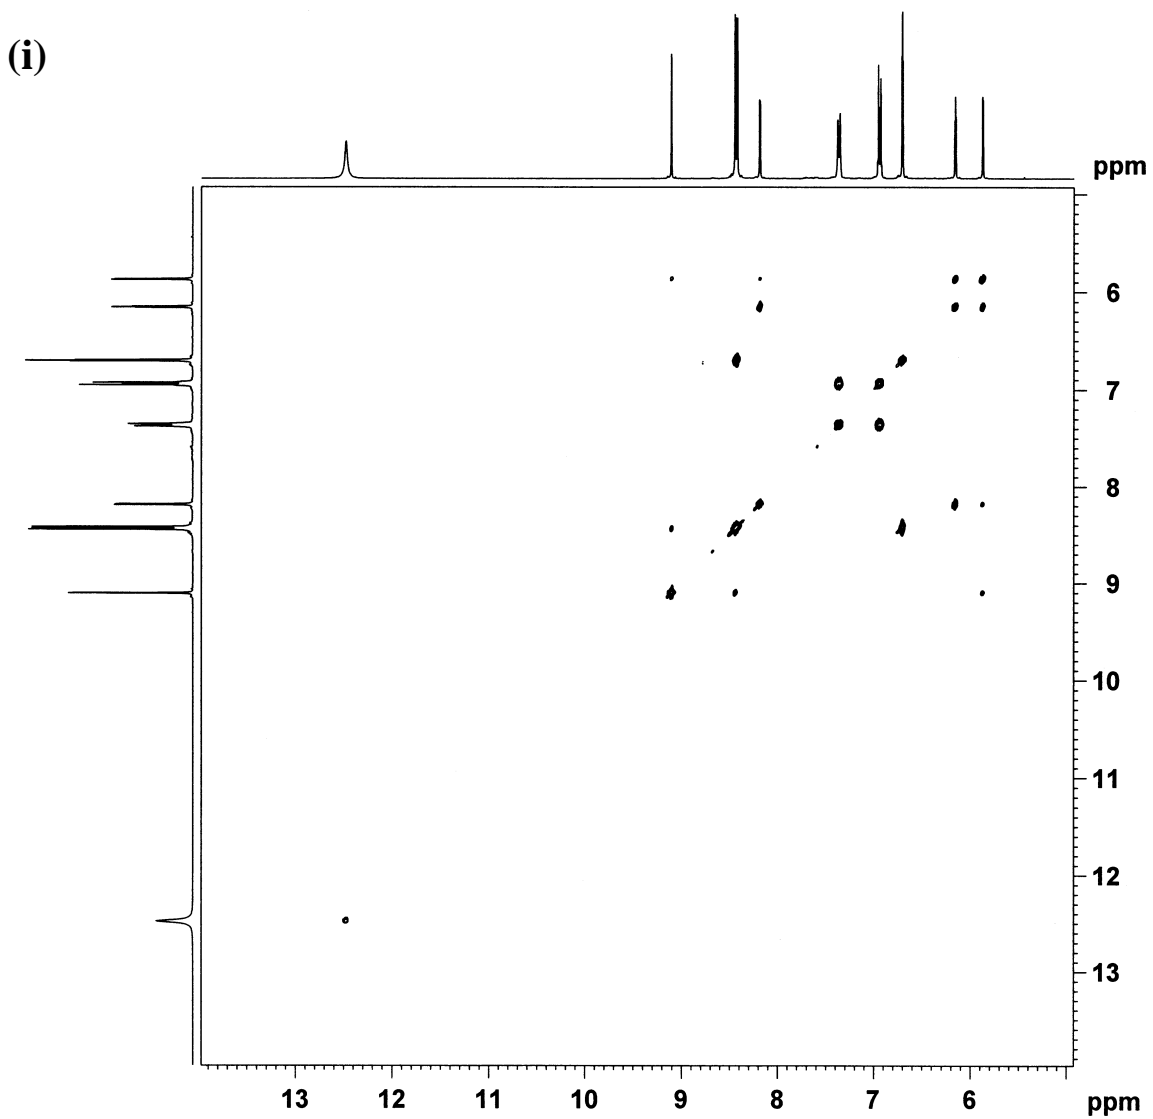

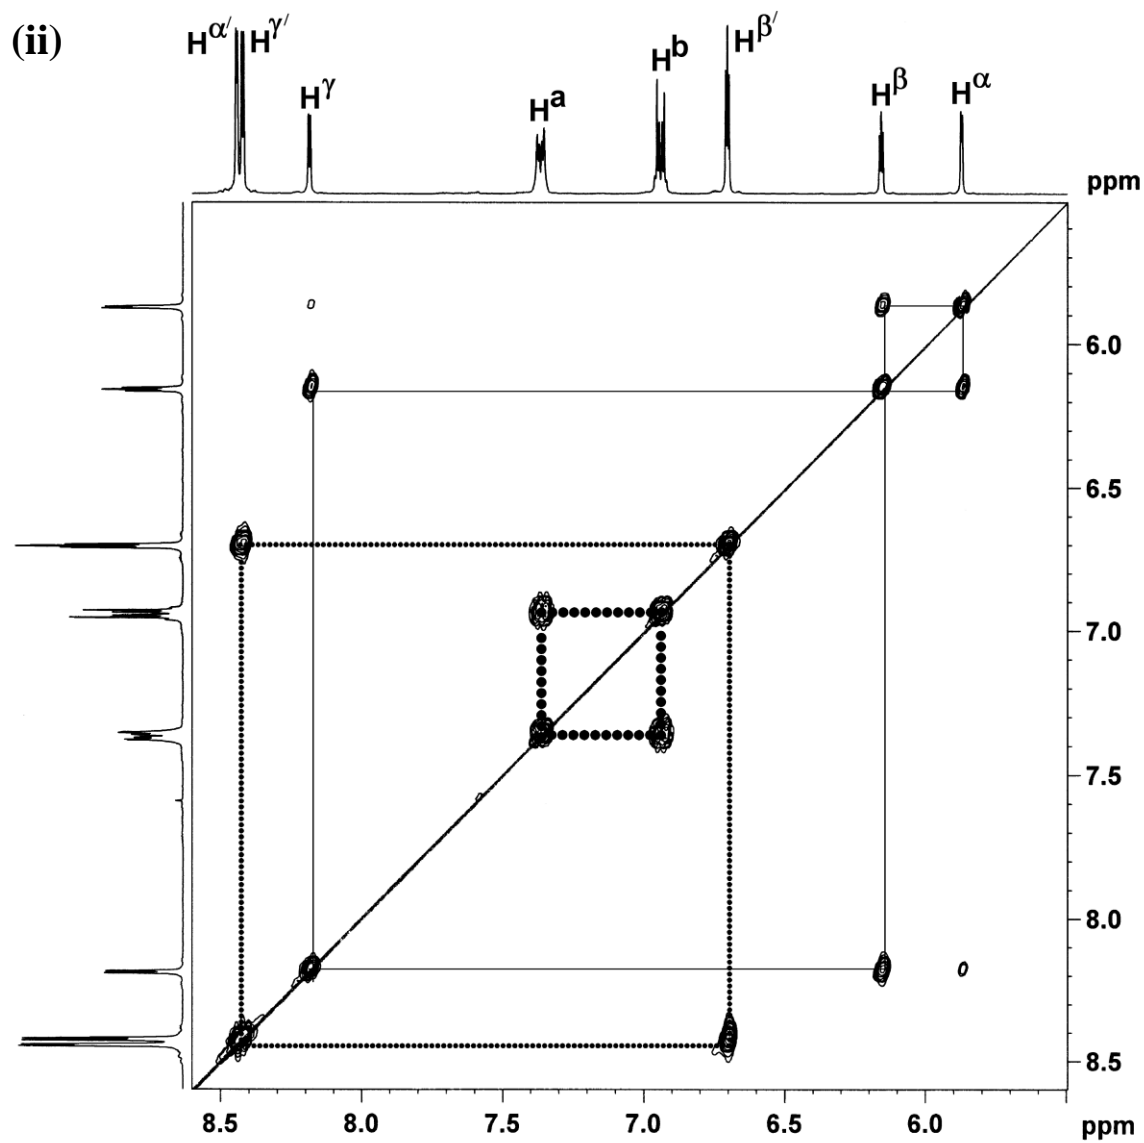

**Fig. S3(c)** 1D NOE (Nuclear Overhauser Enhancement) difference spectrum of [1]ClO<sub>4</sub>

in CD<sub>3</sub>CN on selective irradiation at  $\delta$  9.11 ppm (corresponding to H <sup>$\delta$</sup> ): (i)

excluding N-H resonance, (ii) expanded.

**(i)**

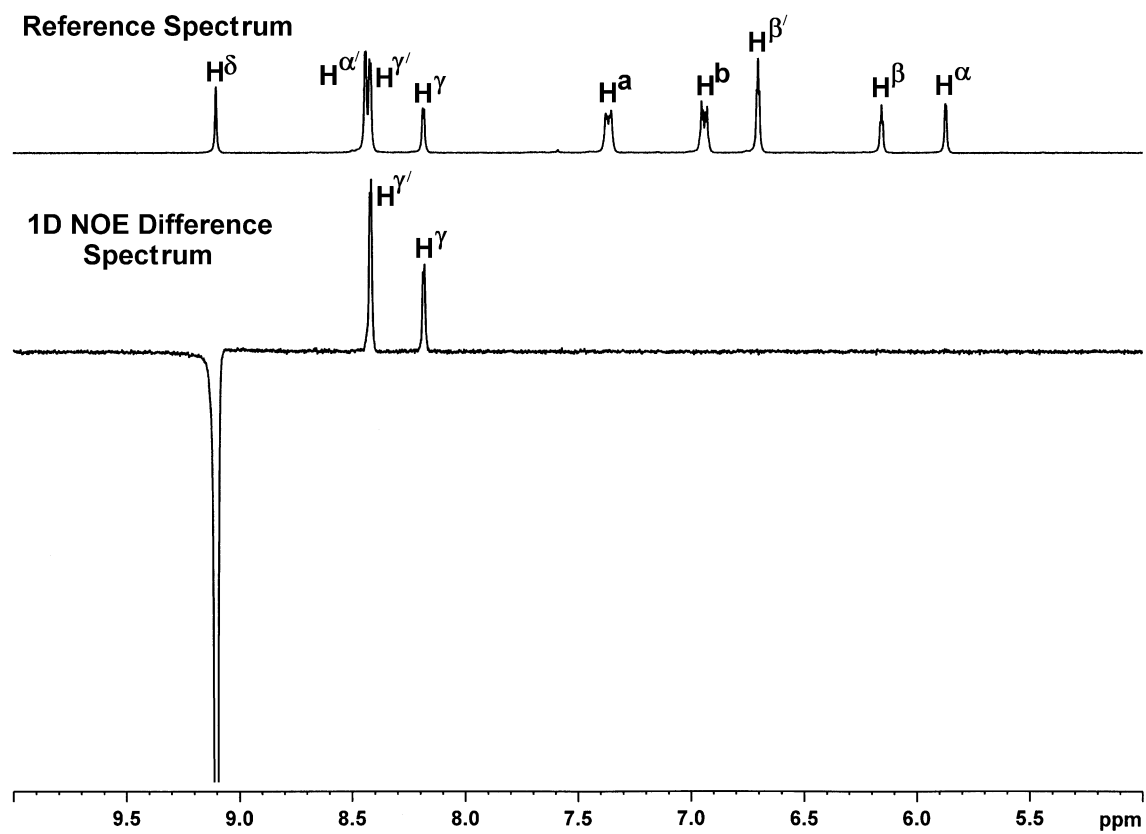

(ii)

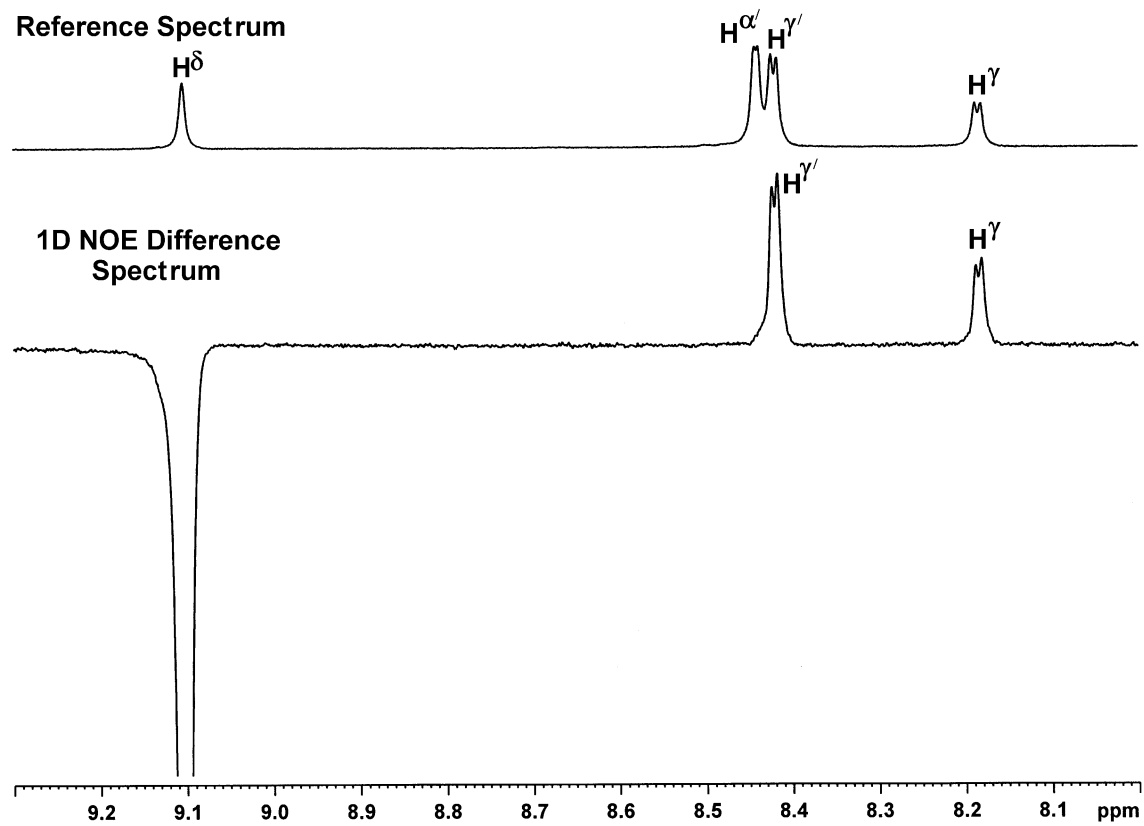

**Fig. S3(d)** 1D NOE (Nuclear Overhauser Enhancement) difference spectrum of [1]ClO<sub>4</sub> in (CD<sub>3</sub>)<sub>2</sub>CO on selective irradiation at  $\delta$  9.89 ppm (corresponding to H <sup>$\delta$</sup> ): (i) excluding N-H resonance, (ii) expanded.

(i)

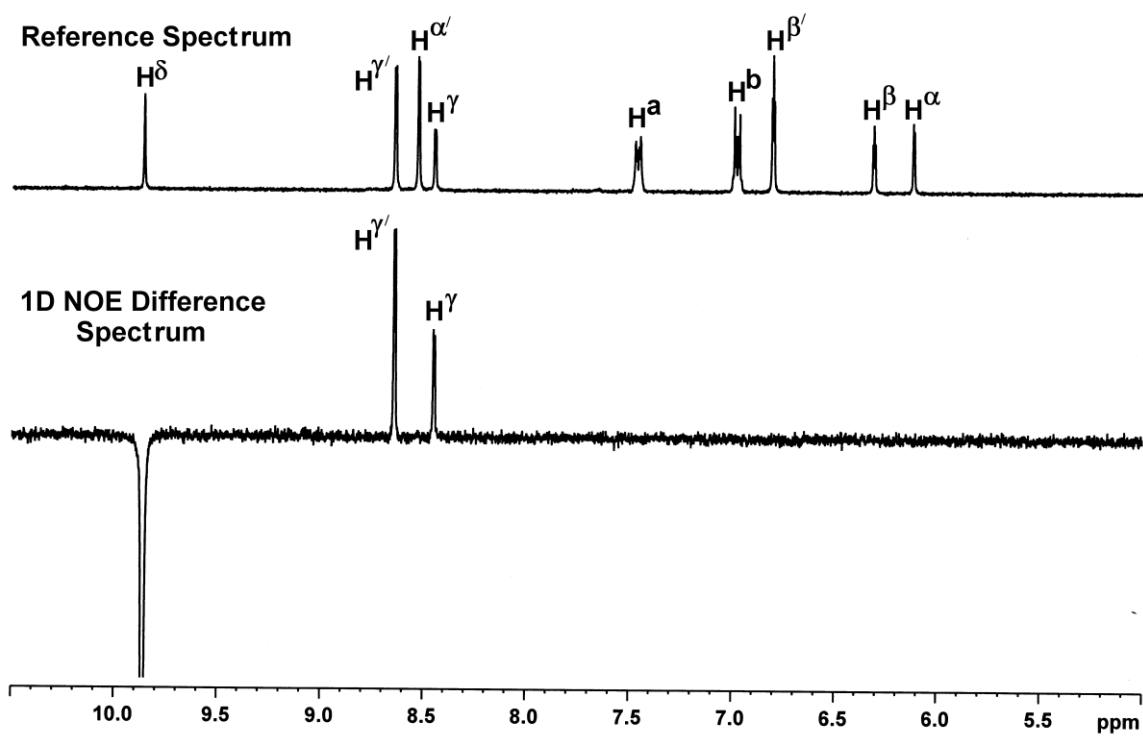



(ii)

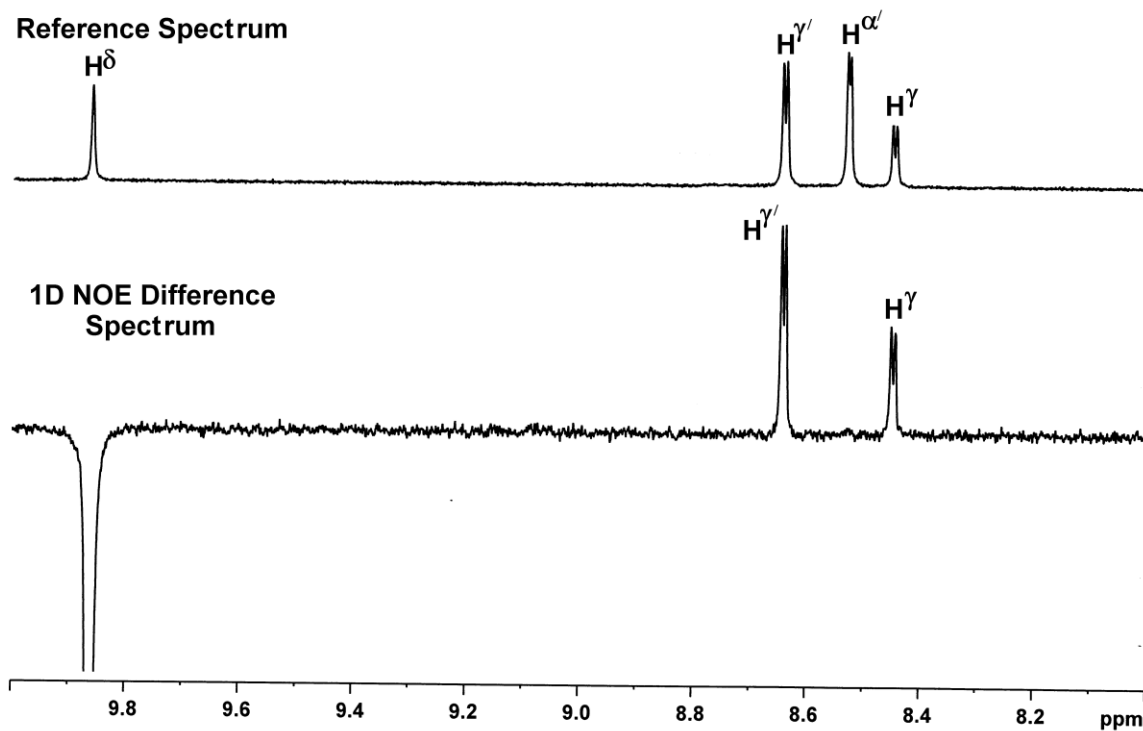

**Fig. S4** Cyclic (solid) and differential pulse (dotted) voltammograms of  $[2](\text{ClO}_4)_2$  at pH 7.0 *versus* SCE. Scan rate  $100 \text{ mV s}^{-1}$ .

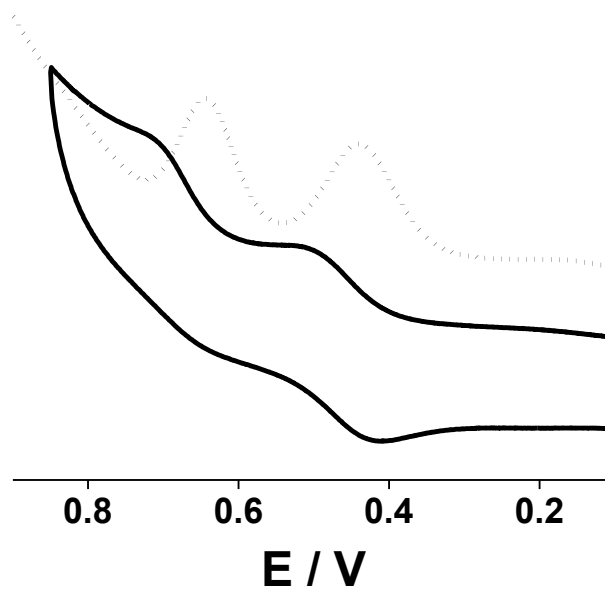

**Fig. S5** Visible spectra of a solution of  $[\text{Ru}(\text{tpm})(\text{bqdi})(\text{H}_2\text{O})]^{2+}$  ( $\mathbf{2}^{2+}$ ) +  $\text{PhI}(\text{OAc})_2$  in  $\text{CH}_2\text{Cl}_2$  (black, in situ generated  $[\text{Ru}(\text{tpm})(\text{bqdi})(\text{O})]^{2+}$  ( $\mathbf{3}^{2+}$ )) and  $\mathbf{2}^{2+}$  +  $\text{PhI}(\text{OAc})_2$  + methyl *p*-tolyl sulfide in  $\text{CH}_2\text{Cl}_2$  (red, in situ generated  $\mathbf{2}^{2+}$  + *p*-tolyl sulfoxide).

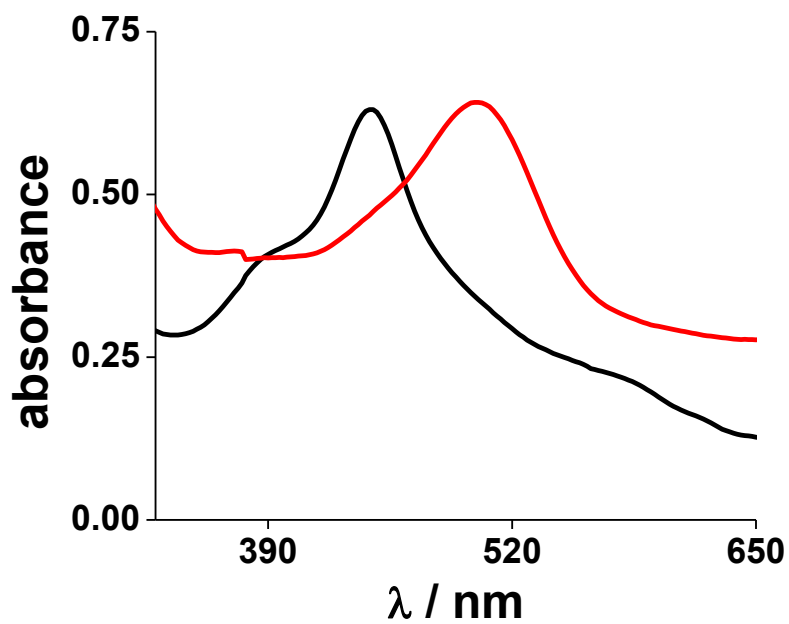

**Fig. S6**  $^{31}\text{P}$  NMR spectra of (a)  $\text{PPh}_3$  in  $\text{CDCl}_3$  ( $\delta = -5.47$  ppm) and (b)  $\mathbf{2}^{2+} + \text{PhI}(\text{OAc})_2$  +  $\text{PPh}_3$  in  $\text{CDCl}_3$  ( $\delta = 29.83$  ppm).

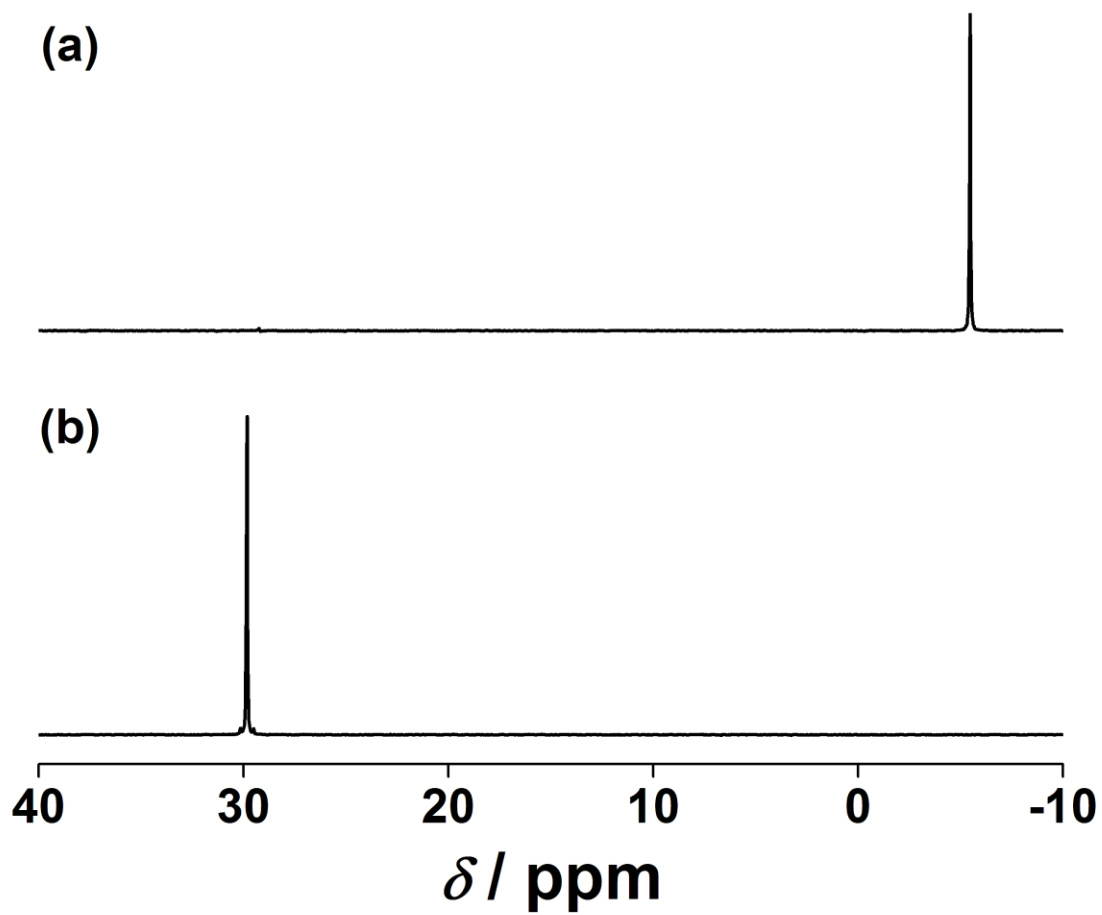

Supplement: c2dt32402d.pdf [file c2dt32402d.pdf]
